# Supplementary material for: Infrared and Raman spectroscopic features of the self-interstitial defect in diamond from exact-exchange hybrid DFT calculations
Source: Royal Society of Chemistry journal article supplement (doi:10.1039/c6cp02403c), 2016-01-01
Supplement: c6cp02403c1.pdf [file c6cp02403c1.pdf]

## Infrared and Raman Spectroscopic Features of the Self-Interstitial Defect in Diamond from Exact-Exchange Hybrid DFT Calculations Supplementary Information

Simone Salustro,<sup>1</sup> Alessandro Erba,<sup>1</sup> Claudio M. Zicovich-Wilson,<sup>2</sup> Yves Noël,<sup>3</sup> Lorenzo Maschio,<sup>1</sup> and Roberto Dovesi<sup>1</sup>

<sup>1</sup>*Dipartimento di Chimica, Università di Torino and NIS - Nanostructured Interfaces and Surfaces - Centre of Excellence, Via Giuria 5, 10125 Torino, Italy*

<sup>2</sup>*Centro de Investigación en Ciencias-(IICBA), Universidad Autónoma del Estado de Morelos, Av. Universidad, 1001, Col. Chamilpa, 62209 Cuernavaca, Morelos (Mexico)*

<sup>3</sup>*Institut des Sciences de la Terre de Paris (UMR 7193 UPMC-CNRS), UPMC, Sorbonne Université, Paris, France*

### I. SPIN DENSITY MAPS OF THE $\langle 100 \rangle$ SELF SPLIT-INTERSTITIAL

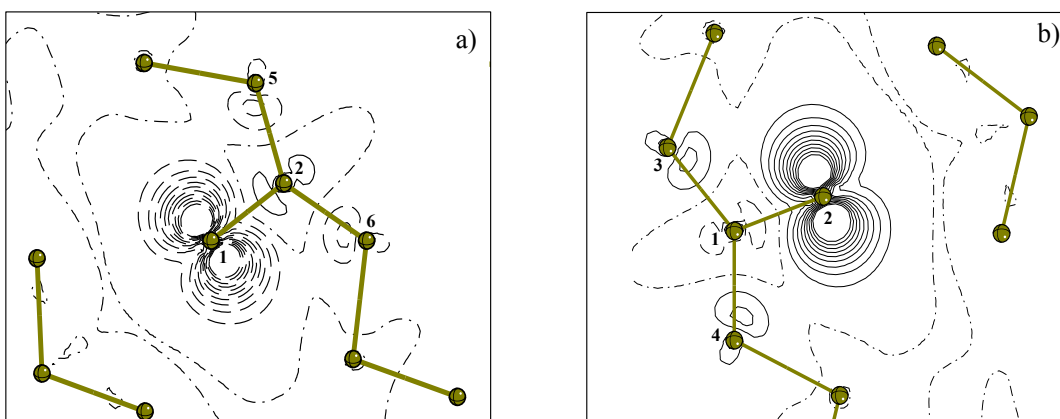

Figure S1: Singlet state spin density maps of the interstitial defective diamond periodic structure along the two planes containing atoms 1, 2, 5 and 6 (a) and 1, 2, 3 and 4 (b). Isodensity lines differ by  $0.01 |e|/(a_0)^3$ ; spin density truncated at  $\pm 0.1 |e|/(a_0)^3$ . Continuous, dashed and dot-dashed lines indicate positive, negative and zero values, respectively.

### II. EFFECT OF METHODS ON RELATIVE STABILITIES OF SINGLET AND TRIPLET SPIN STATES

Table S1: The  $\langle 100 \rangle$  split interstitial defect: total energies (in  $E_h$ ) of  $S_z=0$  ( $E^0$ ) and  $S_z=1$  ( $E^1$ ) spin states and their relative stability ( $\Delta E$ , in  $mE_h$ ) obtained with several functionals with the  $S_{33}$  supercell. The total energy of an  $S_{32}$  cell of pristine diamond is  $-1217.78945 E_h$  for the B3LYP functional.

| Method | $E^0$       | $E^1$       | $\Delta E$ |
|--------|-------------|-------------|------------|
| HF     | -1248.32495 | -1248.32081 | 4.14       |
| HSE06  | -1255.03097 | -1255.02970 | 1.27       |
| PBE0   | -1255.05220 | -1255.05102 | 1.18       |
| B3LYP  | -1255.46117 | -1255.46013 | 1.04       |
| PBE    | -1254.90721 | -1254.90625 | 0.96       |
| LDA    | -1245.42792 | -1245.42773 | 0.19       |

### III. EFFECT OF THE SPIN STATE ON WAVENUMBERS

Table S2: Wavenumbers (in  $\text{cm}^{-1}$ ) of the vibrational modes related to the defect for the closed shell, open shell singlet and triplet states. A is the most intense IR active mode. B, C and D are the Raman active modes, which occur at wavenumbers higher than the pristine diamond peak. Labels of the corresponding irreducible representations (IRREP) are also reported.

| Mode | IRREP          | Closed          |                 | IRREP          | Singlet         |                 |                  | IRREP          | Triplet         |                 |
|------|----------------|-----------------|-----------------|----------------|-----------------|-----------------|------------------|----------------|-----------------|-----------------|
|      |                | S <sub>33</sub> | S <sub>65</sub> |                | S <sub>33</sub> | S <sub>65</sub> | S <sub>129</sub> |                | S <sub>33</sub> | S <sub>65</sub> |
| A    | E              | 473.16          | 510.6           | B <sub>2</sub> | 495.7           | 453.0           | 423.2            | E              | 492.7           | 450.0           |
|      |                |                 |                 | B <sub>1</sub> | 495.7           | 452.9           | 423.0            |                |                 |                 |
| B    | B <sub>1</sub> | 1371.1          | 1411.3          | A <sub>1</sub> | 1315.9          | 1340.8          | 1367.2           | B <sub>2</sub> | 1316.5          | 1341.3          |
| C    | E              | 1451.6          | 1489.2          | B <sub>2</sub> | 1471.6          | 1503.8          | 1529.3           | E              | 1477.7          | 1509.9          |
|      |                |                 |                 | B <sub>1</sub> | 1473.5          | 1505.7          | 1529.3           |                |                 |                 |
| D    | A <sub>1</sub> | 1842.8          | 1901.1          | A <sub>1</sub> | 1837.7          | 1896.9          | 1918.9           | A <sub>1</sub> | 1846.3          | 1905.4          |

### IV. DEFECT CONCENTRATION EFFECT ON BAND STRUCTURES OF THE (100) SELF SPLIT-INTERSTITIAL

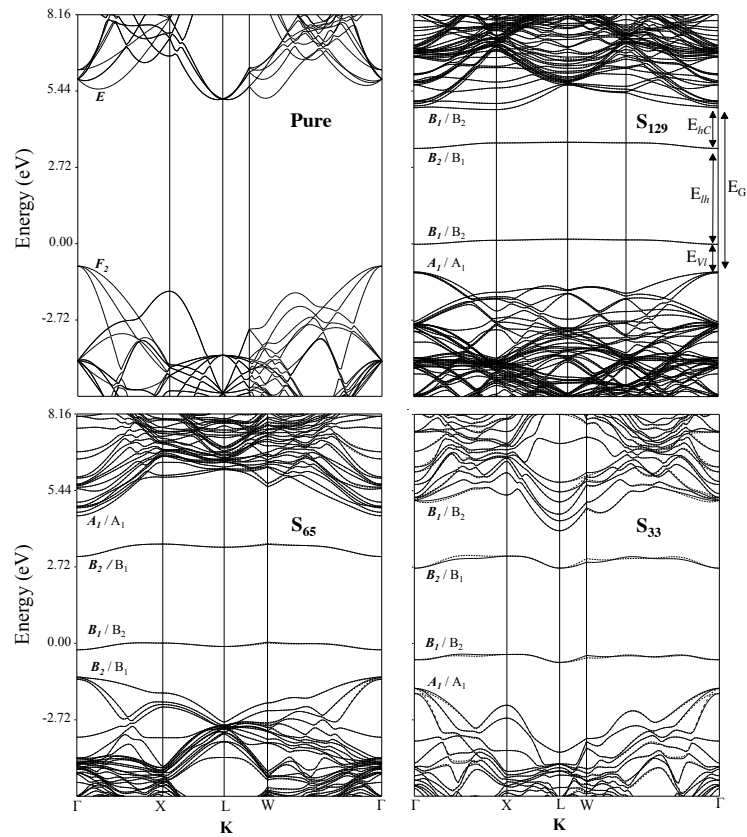

Figure S2: Band structures of pure diamond and of diamond with interstitial defects (S<sub>129</sub>, S<sub>65</sub> and S<sub>33</sub>). Continuous and dashed lines indicate energy levels corresponding to  $\alpha$  and  $\beta$  electrons, respectively. Calculations performed with the B3LYP functional. The symmetry of the electronic bands in the gap (evaluated in  $\Gamma$ ) are reported for  $\alpha$  (**bold**) and  $\beta$  (normal) electrons.

## V. POSSIBLE FORMATION OF A DOUBLE BOND IN $\langle 100 \rangle$ SELF SPLIT-INTERSTITIAL

In order to better understand the geometrical, electronic and energetic features of the  $\langle 100 \rangle$  defect, in which the rotation of a couple of atoms (say  $C_3$  and  $C_4$  to give  $C'_3$  and  $C'_4$ , see Figure 1) by  $90^\circ$  is hindered by the covalent network (and by the adopted  $D_{2d}$  symmetry), a molecular model with less constraints has been considered: the 2,3-Dimethyl-2-butene ( $C_6H_{12}$ ), that contains the same backbone of six carbon atoms as in Figure 1, and in which the peripheral C atoms are saturated with 3 H atoms each. The molecule has been investigated at the  $90^\circ$  geometry (with  $C_{2v}$  symmetry) as in Figure 1 and in the planar geometry ( $D_{2h}$  symmetry); in both cases the symmetry-constrained geometry has been fully optimized; the same functional and basis set have been used as for the bulk. The results are shown in Table S3. The  $C_1$ - $C_2$  distance, that in  $\langle 100 \rangle$  bulk is only 1.30 Å long, in the  $90^\circ$  rotated molecule is as large as 1.47 Å whereas in the planar molecule is 1.34 Å long. The difference between these two values is a typical difference between a double and a single bond. The short 1.30 Å bond in  $\langle 100 \rangle$  is then not the evidence of a double bond, rather of a very compressed situation due to the insertion of an additional atom in the very packed structure of diamond. The Overlap Bond Population (OBP) among the two central atoms for the single bond is 0.43 (molecule) and 0.39  $|e|$  ( $\langle 100 \rangle$  interstitial); in the planar molecule, OBP increases to 0.64  $|e|$ . The compression in the bulk explains also the short  $C_1$ - $C_3$  distance: 1.42 Å in  $\langle 100 \rangle$  to be compared to 1.51 Å in the molecule; the spin polarization, on the contrary, on both  $C_1$  and  $C_3$  is essentially the same in the bulk and in the molecule.

The electronic structure and the energy of the two molecular configurations are quite different: the total energy of the planar geometry is 94 mE<sub>h</sub> (2.5 eV) lower than that of the “rotated” molecule; moreover, the former is in a singlet state with a double bond and no spin polarization (closed shell, then), the latter a singlet with two unpaired electrons. This suggests that in the  $\langle 100 \rangle$  split interstitial a rotation of  $C_3$  and  $C_4$  to form a planar local  $C_6$  backbone would bring a consistent energy lowering due to the formation of a double bond. This however would imply to pull the six bonds with the neighbors of  $C_1$  and  $C_2$ .

In order to reach additional insight on the possible energy gain and loss with the rotation, and on the related geometry features, our molecular model has been used to investigate also intermediate geometries: a scan of the torsional angle  $\theta$  from  $90^\circ$  to  $0^\circ$  has been performed allowing relaxation of all other degrees of freedom. In Figure S3 the evolution of the  $C_1$ - $C_2$  distance and OBP, of the total energy of the molecule and of the magnetic moment on the two central atoms is reported. It turns out that, when starting from  $90^\circ$ , the rotation angle must reach about  $60^\circ$  before a sharp modification of all quantities takes place. The  $C_1$ - $C_2$  distance drops down, the OBP increases to values close to the ones typical of a double bond, the atomic magnetic moment  $\mu$  decreases from one to zero. In summary, a consistent modification of the electronic structure in the interstitial defect of Figure 1 would take place only if the  $90^\circ$  angle would reduce to at least  $60^\circ$ ; the cost of this rotation is expected to be larger than the energy gain obtained by the formation of the double bond, as six C-C bonds must be significantly stretched.

This hypothesis has been checked by performing a rigid rotation in the bulk of  $C_3$ - $C_4$  with respect to the  $C_1$ - $C_2$  axis, and of  $C_5$ - $C_6$  in the opposite direction towards the planar configuration. As expected, the energy increases very steeply. When allowed to relax after rotation, by optimizing all parameters in the cell (the rotation reduces the symmetry to  $D_2$ ), the bulk geometry evolves back to the original  $90^\circ$  configuration. Additional attempts to find a possible lower minimum related to a somehow less orthogonal geometry of the six C atoms, performed eliminating all the symmetry constraints and starting from a deformed geometry, end up in all cases with the  $90^\circ$  geometry. The configuration shown in Figure 1 is by far the most stable with respect to less symmetric situations in which a partial double bond appears.

Table S3: Total energy E (in E<sub>h</sub>), interatomic distances R (in Å) and Mulliken analysis data (in  $|e|$ ) for the  $C_6H_{12}$  molecular model; q (net charges),  $\mu$  (spin momentum) and B (bond population) are reported for two different steric configurations. In  $D_{2h}$  the position and the labels of the carbon atoms are as in Figure 1 for the interstitial defect. in  $C_{2v}$  the carbon skeleton is planar (3' and 4' white atoms in Figure 1) and there is a double bond among the two central atoms (1 and 2).

| Symmetry | E        | R(1-2) | R(1-3) | q <sub>1</sub> | $\mu_1$ | $\mu_3$ | B(1-2) |
|----------|----------|--------|--------|----------------|---------|---------|--------|
| $D_{2h}$ | -235.475 | 1.345  | 1.520  | -0.054         | 0.000   | 0.000   | 0.636  |
| $C_{2v}$ | -235.381 | 1.472  | 1.513  | -0.055         | 1.066   | -0.128  | 0.425  |

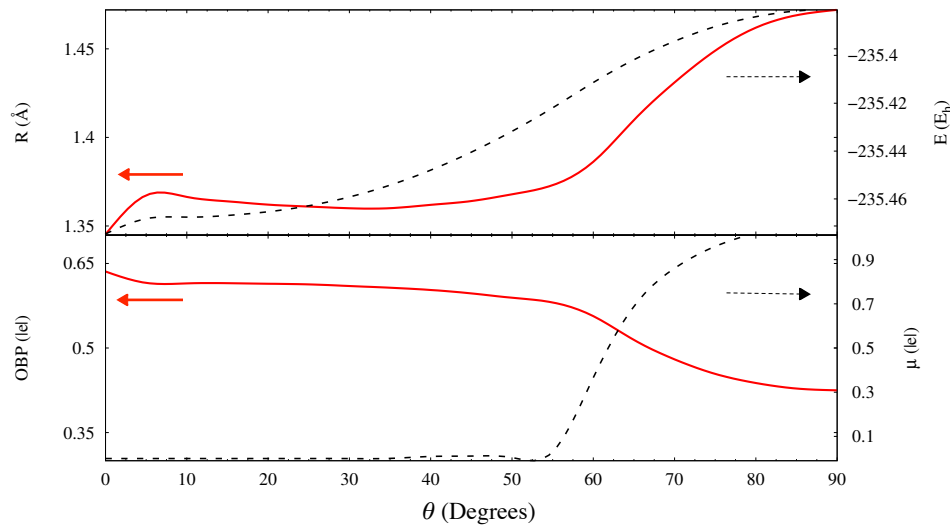

Figure S3: The total energy  $E$ , the distance between the two central atoms  $R$ , their overlap bond population  $OBP$  and the  $C_1$  atomic magnetic moment  $\mu$  of the  $C_6H_{12}$  molecule as a function of the torsional angle  $\theta$  of the carbon backbone. Continuous lines have the ordinate on the left, dotted lines have the ordinate to the right (see the associated arrows).

## VI. ISOTOPIC SUBSTITUTION $^{12}C \rightarrow ^{13}C$ OF THE 6 ATOMS OF THE $\langle 100 \rangle$ SELF SPLIT-INTERSTITIAL

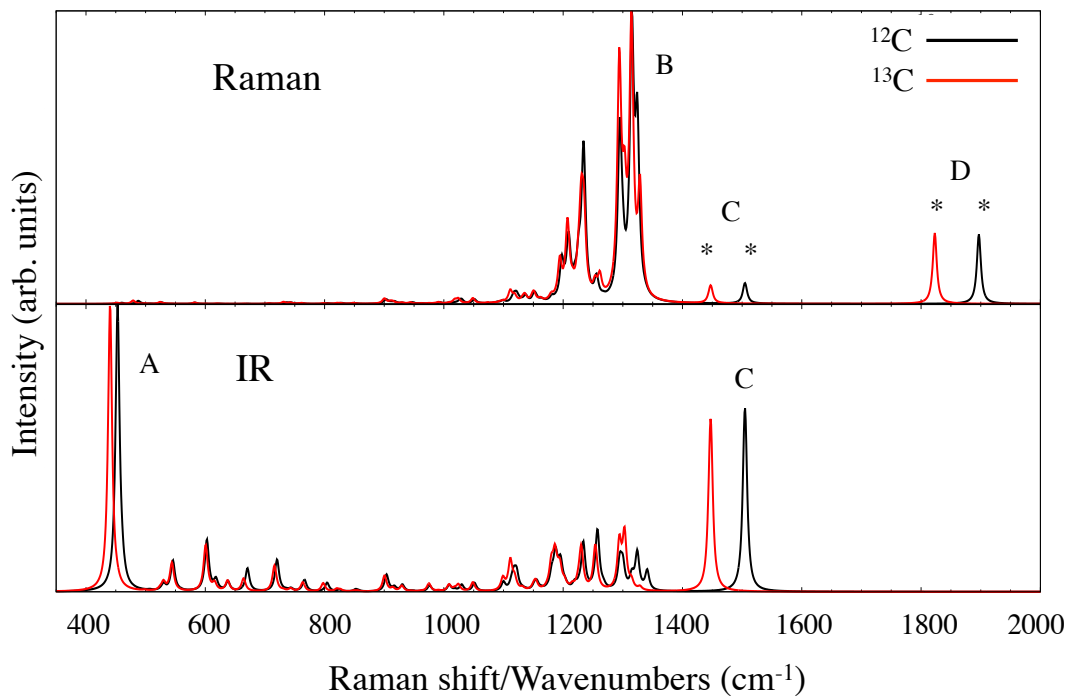

Figure S4: Simulated Raman (upper panel) and IR (lower panel) spectra of  $\langle 100 \rangle$  defective diamond before (black line) and after (red line) isotopic substitution ( $^{12}C \rightarrow ^{13}C$ ) of the 6 atoms reported in Figure 1 in the article. The intensity of the peaks marked with \* has been multiplied by a factor 12. Raman shift variations due to the isotopic substitution for B, C and D peaks are: 1340.2 to 1328.7, 1504.7 to 1447.1, 1896.9 to 1822.9, respectively. IR wavenumber variations for The A peak wavenumber shifts from 453.0 to 440.4.

## VII. SPIN DENSITY MAPS AND BAND STRUCTURES FOR THE BOND-CENTERED INTERSTITIAL DEFECT

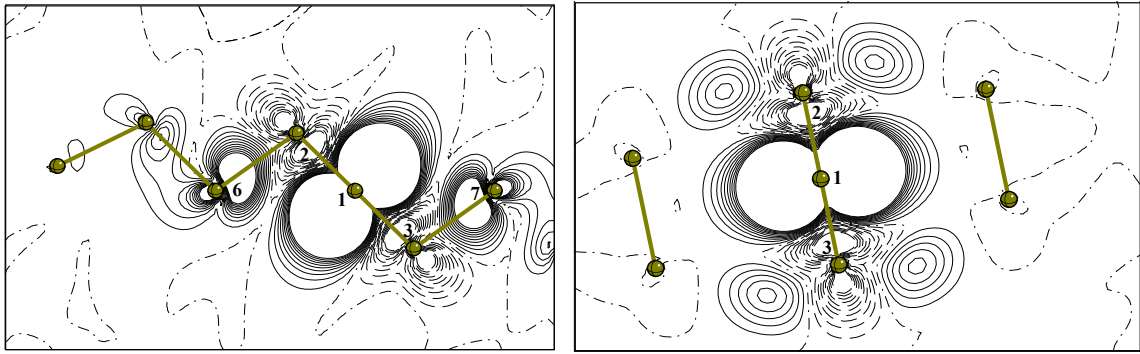

Figure S5: Spin density maps of the BC interstitial defect, for the  $S_z=1$  spin state at the lowest concentration of defects ( $S_{129}$ ). With reference to Figure 1, in the left panel the spin polarization is projected on the plane containing atoms 1, 2, 3, 6 and 7; in the right panel, spin polarization is projected on the plane orthogonal to the previous one.

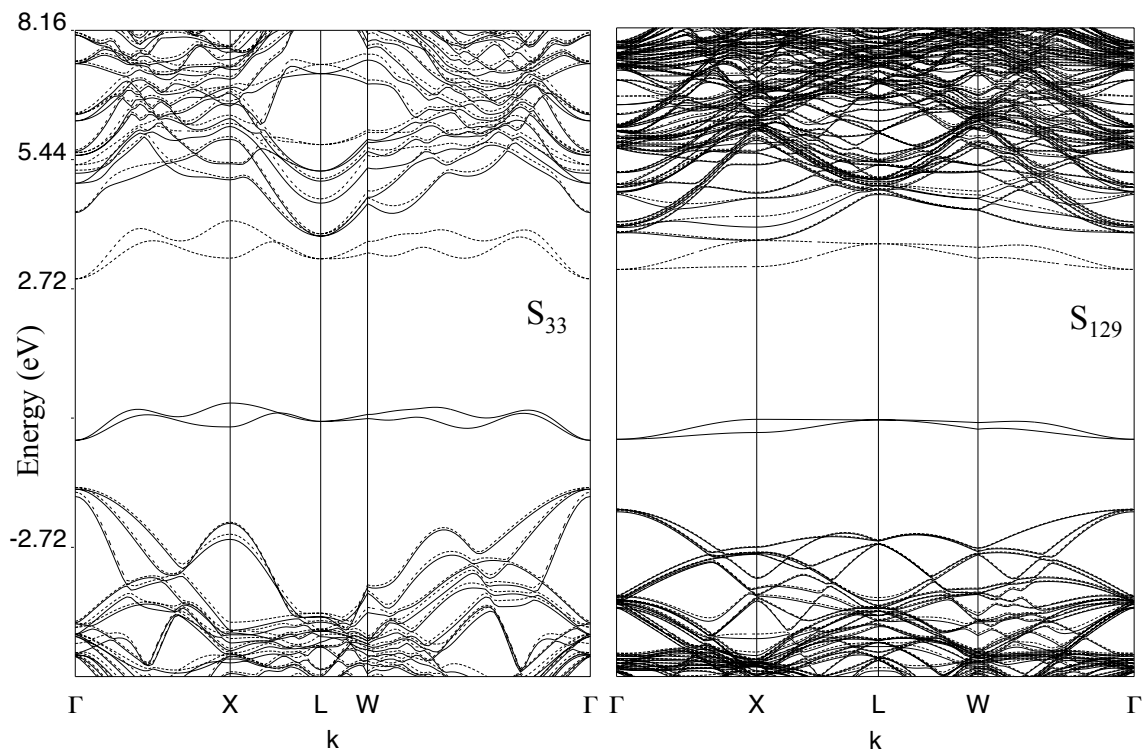

Figure S6: Band structure of the BC interstitial defect, for the  $S_z=1$  spin state at two different concentrations ( $S_{33}$  and  $S_{129}$ ). Continuous and dashed lines indicate energy levels corresponding to  $\alpha$  and  $\beta$  electrons, respectively.
